# Supplementary material for: High-efficiency and simple synthesis of Ti3C2Tx nanoscrolls by surface energy modulation and cryogenic freezing
Source: Royal Society of Chemistry journal article supplement (doi:10.1039/d2na00520d), 2022-01-01
Supplement: d2na00520d1.pdf [file d2na00520d1.pdf]

## Supporting Information for

### High-efficient and simple synthesis of $\text{Ti}_3\text{C}_2\text{T}_x$ nanoscrolls by surface energy modulation and cryogenic freezing

Ke Tan,<sup>†</sup> Sen Liu,<sup>†</sup> Yang Liu,\* Linrui Hou,\* Changzhou Yuan\*

*School of Material Science & Engineering, University of Jinan, Jinan, 250022, P. R. China*

\*Corresponding authors

E-mail: mse\_liuy@ujn.edu.cn (Y. Liu)

mse\_houlr@ujn.edu.cn (L. Hou)

mse\_yuancz@ujn.edu.cn (L. Hou)

<sup>†</sup> Ke Tan and Sen Liu equally contributed the work.

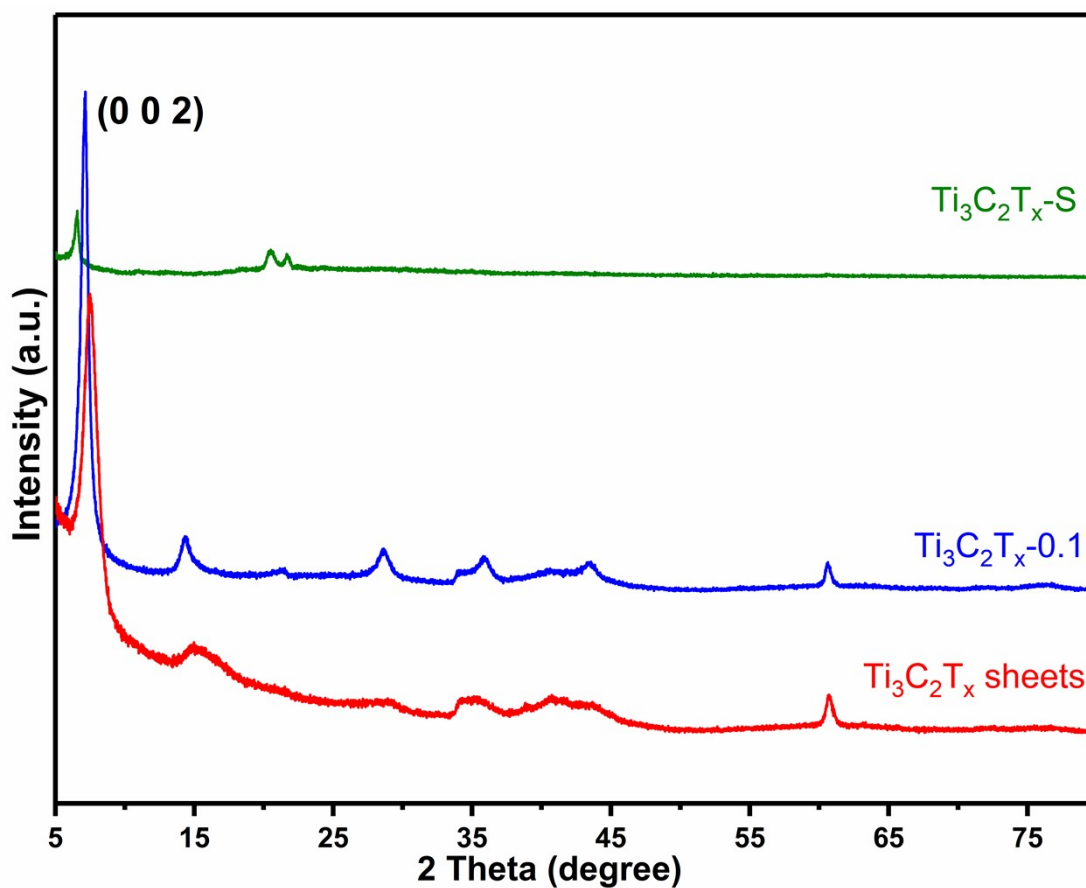

**Fig. S1.** XRD patterns of Ti<sub>3</sub>C<sub>2</sub>T<sub>x</sub> sheets, Ti<sub>3</sub>C<sub>2</sub>T<sub>x</sub>-0.1 and Ti<sub>3</sub>C<sub>2</sub>T<sub>x</sub>-S.

As shown in the XRD pattern (**Fig. S1**), Ti<sub>3</sub>C<sub>2</sub>T<sub>x</sub> NSs are well prepared with a clear (002) crystal plane. After being frozen by liquid nitrogen and freeze-drying, the spacing between layers of Ti<sub>3</sub>C<sub>2</sub>T<sub>x</sub>-0.1 becomes bigger because the (002) crystal plane shifts to lower angle than Ti<sub>3</sub>C<sub>2</sub>T<sub>x</sub> sheets.

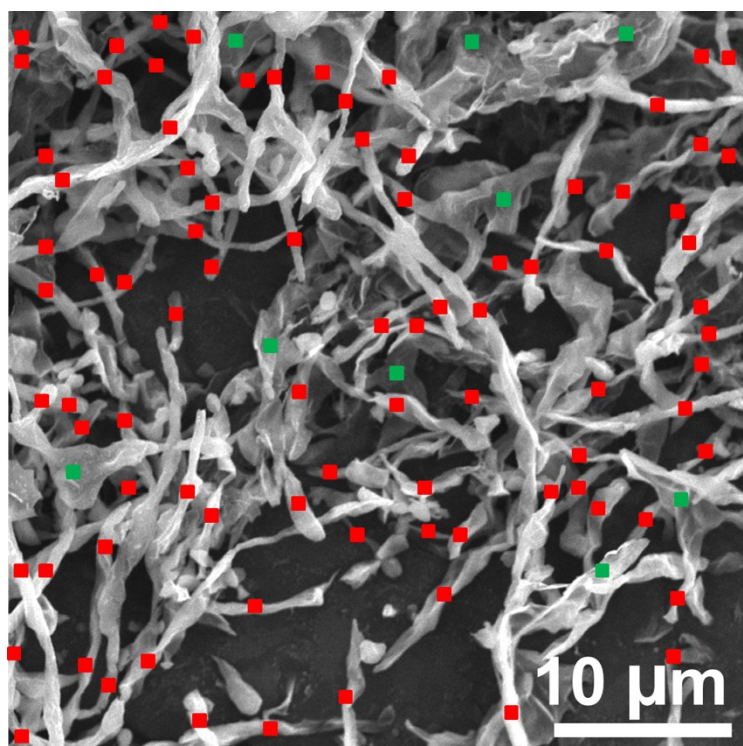

**Fig. S2.** SEM image of Ti<sub>3</sub>C<sub>2</sub>T<sub>x</sub>-S after marked sheets (9 green cubes) and nanoscrolls (86 red cubes).

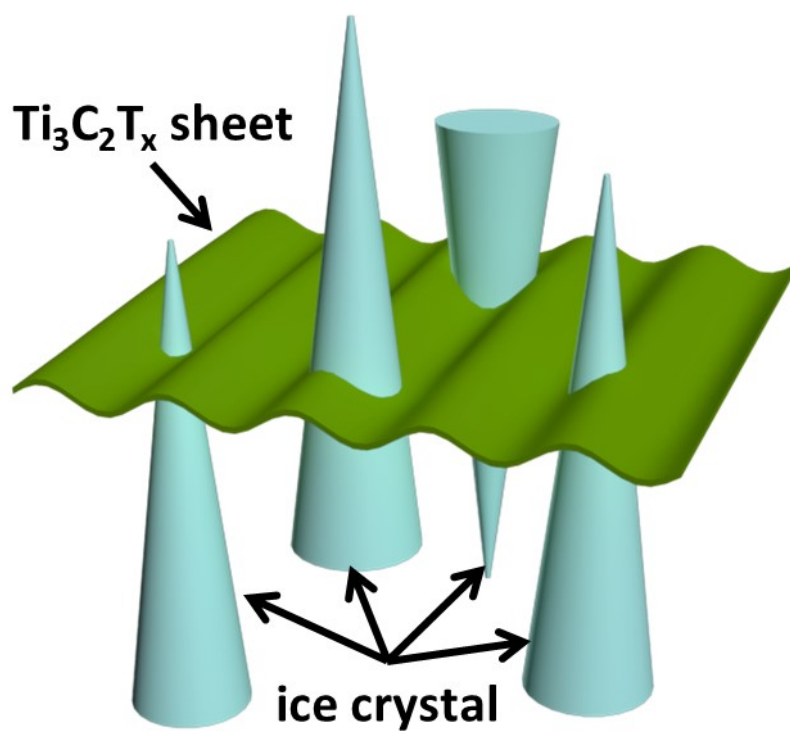

**Fig. S3** Schematic illustration of ice crystal growth in low-concentration  $\text{Ti}_3\text{C}_2\text{T}_x$  dispersion when frozen by liquid nitrogen.

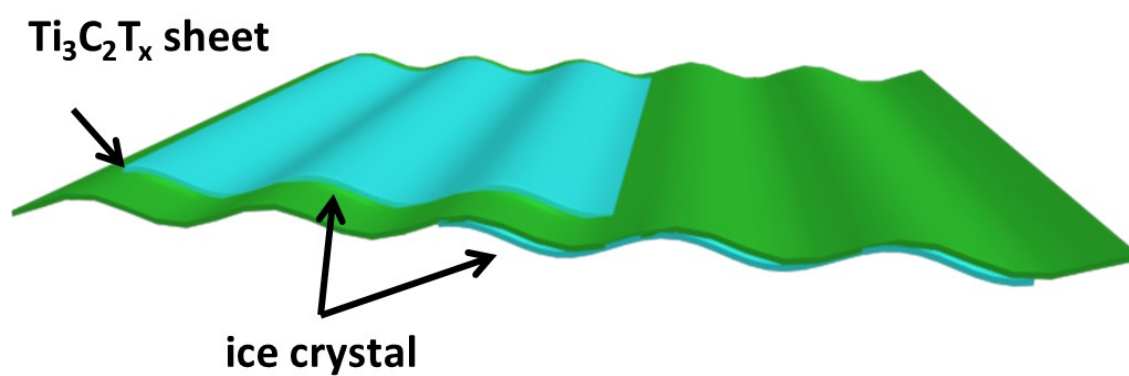

**Fig. S4** Schematic illustration of ice crystal growth in  $0.1 \text{ g mL}^{-1}$   $\text{Ti}_3\text{C}_2\text{T}_x$  dispersion when frozen by refrigerator.

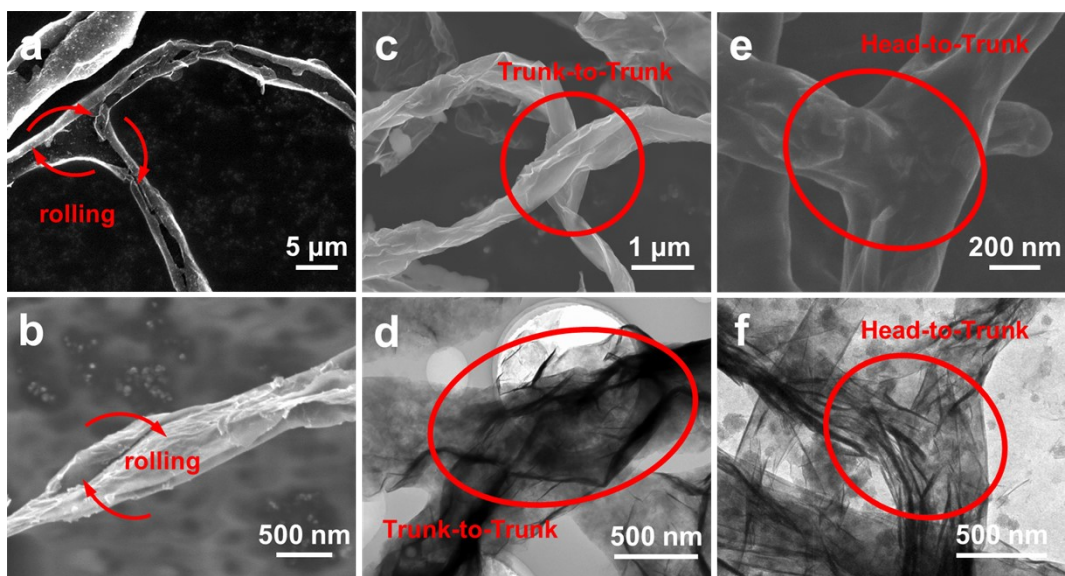

**Fig. S5** SEM images of (a) half roll-up structure and (b) roll-up structure in  $\text{Ti}_3\text{C}_2\text{T}_x\text{-S}$ ; (c) SEM image and (d) TEM image of the trunk-to-trunk structure of  $\text{Ti}_3\text{C}_2\text{T}_x\text{-S}$ ; (e) SEM image and (f) TEM image of the head-to-trunk structure of  $\text{Ti}_3\text{C}_2\text{T}_x\text{-S}$ .
